# Supplementary material for: Granzyme A Deficiency Breaks Immune Tolerance and Promotes Autoimmune Diabetes Through a Type I Interferon–Dependent Pathway
Source: Oxford University Press journal article supplement (doi:10.2337/db17-0517), 2017-07-21
Supplement: db170517supplementarydata.pdf [file db170517supplementarydata.pdf]

SUPPLEMENTARY DATA

**Supplementary Figure S1.** T cell development is similar in NOD and NOD.Gzma<sup>-/-</sup> mice. **(A)** Absolute cell number after lysis of red blood cells in spleens isolated from NOD and NOD.Gzma<sup>-/-</sup> mice at 10 weeks of age (n=7). **(B)** The percentage of CD4<sup>+</sup>CD8<sup>-</sup> T cells and **(C)** CD8<sup>+</sup>CD4<sup>-</sup> T cells in thymus (n=7), spleen (n=7), pancreatic lymph nodes (n=9) and inguinal lymph nodes (n=7) from 10 week-old mice. Data for individual mice are shown with mean±SEM. **(D, E)** The percentage of CD45<sup>+</sup> cells in the islets of 4 week (D) and 10 week (E) old mice that were cDC, pDC, macrophages (mac) and B cells. Data for individual mice are shown (n=2-6) with mean±SEM. **(F, G)** The percentage of CD45<sup>+</sup> cells in the islets of 10 week-old mice that were CD3<sup>+</sup>CD4<sup>+</sup> or CD3<sup>+</sup>CD8<sup>+</sup> T cells (F) or NK cells (G). Data for individual mice are shown (n=5-7) with mean±SEM. No significant differences were observed except \*\*p<0.01 for NK cells (G), unpaired two-tailed Student's t-test.

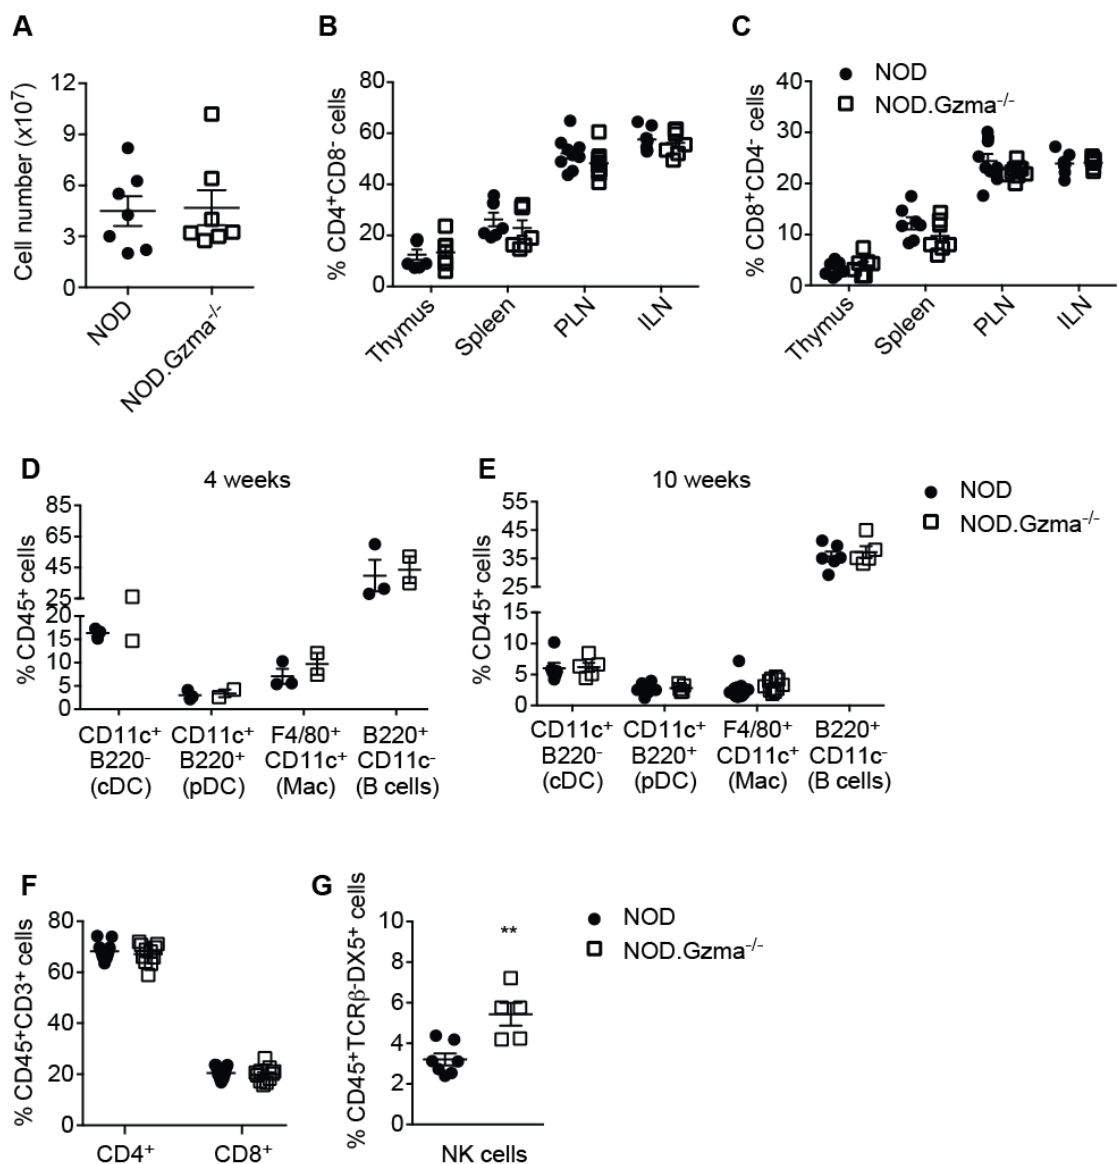

## SUPPLEMENTARY DATA

**Supplementary Figure S2.** Regulatory T cell development and function are intact in NOD.Gzma<sup>-/-</sup> mice. The percentage of Foxp3<sup>+</sup>CD4<sup>+</sup> T cells in (A) thymus (n=7), spleen (n=7), pancreatic lymph node (n=9), inguinal lymph node (n=7) and (B) islets (n=3) from NOD and NOD.Gzma<sup>-/-</sup> at 10-14 weeks of age. Data for individual mice are shown with mean±SEM. No significant differences using unpaired two-tailed Student's t-test. (C) Foxp3<sup>+</sup>CD4<sup>+</sup> regulatory T cell function measured by <sup>3</sup>H-thymidine incorporation. Effector T cells from NOD mice were mixed with regulatory T cells from either NOD or NOD.Gzma<sup>-/-</sup> mice at ratios of 1:0.1, 1:1 or 1:2. One experiment performed in triplicate is shown.

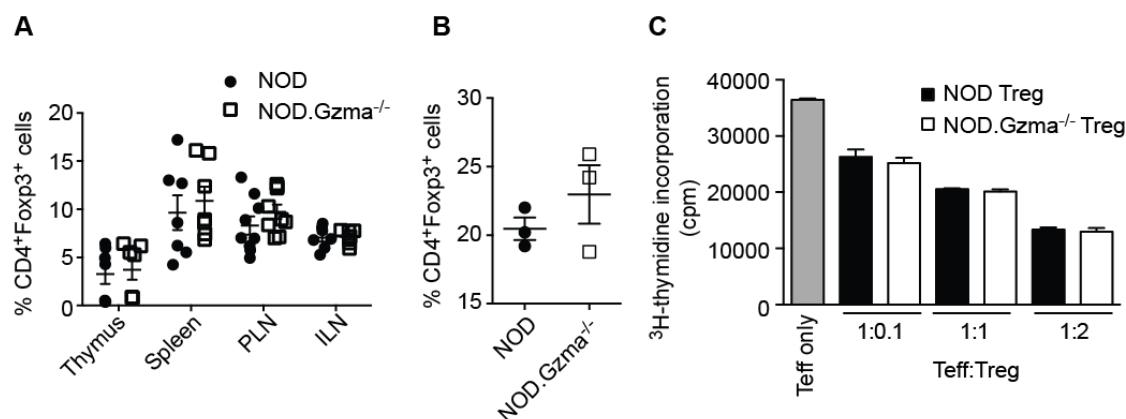

# SUPPLEMENTARY DATA

**Supplementary Figure S3.** Dendritic cell function is normal in NOD.Gzma<sup>-/-</sup> mice. **(A)** Inguinal (ILN) and pancreatic lymph nodes (PLN) were harvested from 6 week old NOD or NOD.Gzma<sup>-/-</sup> mice 5 days after transfer of CFSE-labeled NOD8.3 CD8<sup>+</sup> T cells. Representative FACS plots showing the proportion of proliferated CD8<sup>+</sup> T cells (left), and pooled data from n=7 mice per group showing mean±SEM (right). \*p<0.0001 comparing ILN to PLN, unpaired Student's t-test. **(B)** Geometric mean fluorescence intensity of staining for CD80, CD86, MHC class II and CD40 on splenic CD11c<sup>+</sup> DC cultured for 48 hours. N=4-5 mice/genotype showing mean±SEM. No significant differences between genotypes, unpaired Student's t-test. **(C)** IFNα production by splenic pDC cultured for 18 hours in the absence (unstim) or presence of CpG<sub>2216</sub>, measured by flow cytometry. N=4 mice per genotype showing mean±SEM. No significant differences between genotypes, unpaired Student's t-test. **(D, E)** Quantitative real time PCR of *Tlr9* (D) or *Ifnb* (E) gene expression from pDC or cDC isolated from wild-type NOD (n=4) or NOD.Gzma<sup>-/-</sup> (n=4) mice. Data show delta CT values for individual mice with mean±SEM. No significant differences between groups, unpaired Student's t-test. (C-E) Each data point represents cells pooled from the spleens of two mice.

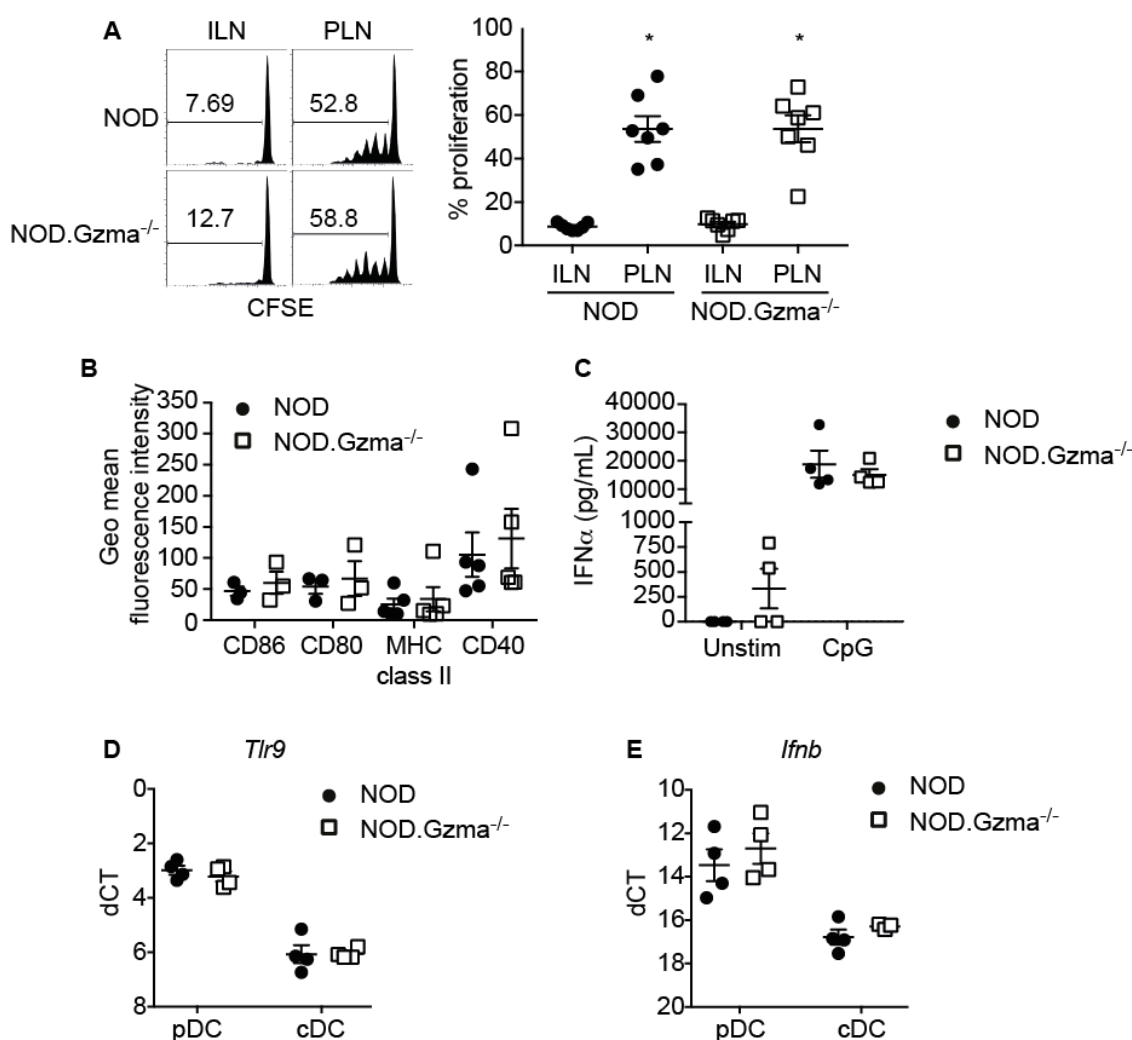

# SUPPLEMENTARY DATA

**Supplementary Figure S4.** Control tetramer staining. Representative FACS plots showing absolute number of (A) CLIP control or insulin<sub>B10-23</sub>-specific CD4<sup>+</sup> T cells or (B) TUM control or IGRP<sub>206-214</sub>-specific CD8<sup>+</sup> T cells in the peripheral lymphoid organs from NOD.PI (A) or NOD (B) mice. Top right quadrant shows absolute number of tetramer<sup>+</sup> T cells.

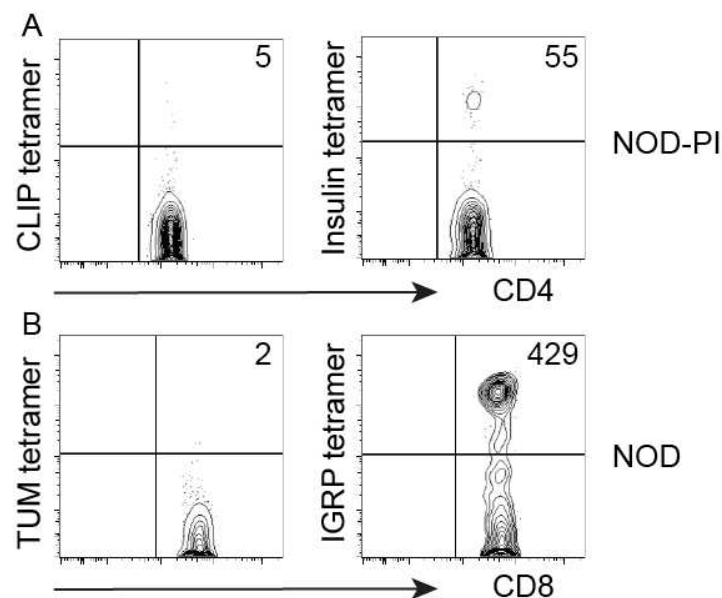

# SUPPLEMENTARY DATA

**Supplementary Table S1.** Oligonucleotides used in the generation of 3' flap substrate for nuclease activity. Complementary sequences are color coded.

|      |                                                                       |
|------|-----------------------------------------------------------------------|
| Xom1 | 5'ACGCTGCCGAATTCTACCAAGTGCCTTGCTAGGACATCTTTGCCCACCTGCAGGTT<br>CACCC3' |
| Xo3  | 5'CATGGAGCTGTCTAGAGGATCCGACTATCG3'                                    |
| Xo4  | 5'CGATAGTCGGATCCTCTAGACAGCTCCATGTAGCAAGGCACTGGTAGAATTCGG<br>CAGCGT3'  |

**Supplementary Table S2.** Fold-change of IFN-regulated gene expression in islets from 4- and 10-12-week old NOD (n=6-9) and NOD.Gzma<sup>-/-</sup> (n=6-8) mice, calculated relative to gene expression in islets from 4-week old NOD.Gzma<sup>-/-</sup>Ifnar1<sup>-/-</sup> (n=7) mice using the  $\Delta\Delta CT$  method with *Actin-b* as a housekeeping gene. Mean and SEM are shown. P values calculated by t-test between NOD and NOD.Gzma<sup>-/-</sup> for each gene.

| Gene         | 4-weeks of age |            |         | 10-12-weeks of age |            |         |
|--------------|----------------|------------|---------|--------------------|------------|---------|
|              | NOD            | NOD.Gzma   | P value | NOD                | NOD.Gzma   | P value |
| <i>Mx1</i>   | 1.67±0.45      | 4.85±1.05  | 0.011   | 12.21±2.09         | 17.89±1.99 | 0.078   |
| <i>Isg15</i> | 3.94±0.81      | 8.54±2.03  | 0.044   | 10.27±2.01         | 22.42±5.10 | 0.051   |
| <i>Ifit1</i> | 0.81±0.16      | 2.89±0.79  | 0.016   | 5.18±0.84          | 12.23±2.79 | 0.036   |
| <i>Oas1a</i> | 9.06±2.59      | 25.55±6.94 | 0.034   | 11.02±2.33         | 25.61±8.00 | 0.111   |
